# Supplementary material for: In situ autologous growth of self-supporting NiFe-based nanosheets on nickel foam as an efficient electrocatalyst for the oxygen evolution reaction
Source: Royal Society of Chemistry journal article supplement (doi:10.1039/c9ra04368c), 2019-01-01
Supplement: c9ra04368c1.pdf [file c9ra04368c1.pdf]

# Supporting Information

## In situ autologous growth of self-supporting NiFe-based nanosheets on nickel foam as efficient electrocatalyst for oxygen evolution reaction

Jiaying Wang,<sup>1</sup> Xue Teng,<sup>1</sup> Yanli Niu,<sup>1</sup> Lixia Guo,<sup>1</sup> Jianfei Kong,<sup>2</sup> Xiaoming He<sup>1</sup> and  
Zuofeng Chen\*<sup>1</sup>

1. Shanghai Key Lab of Chemical Assessment and Sustainability, School of Chemical Science and Engineering, Tongji University, Shanghai 200092, China; 2. Jiangsu Vocational College of Medicine, Yancheng 224005, Jiangsu Province, China.

### EXPERIMENTAL

*Tafel plot.* The current-potential data of the nickel foam with an active catalyst coating were obtained by linear sweep voltammetry (LSV) at a very slow scan rate of 0.1 mV/s. The Tafel slope was obtained from the LSV plot using a linear fit applied to points in the Tafel region. The solution resistance measured prior to the data collection (using  $iR$  test function) was used to correct the Tafel plot for the  $iR$  drop.

*Electrochemical impedance spectroscopy (EIS).* The EIS was recorded under given overpotentials over a frequency range from 0.01 Hz to 1 MHz at the amplitude of the sinusoidal voltage of 5 mV. The explicit Nyquist plots were obtained based on the EIS data.

*Calculation of ECSA.* The electrochemically active surface area (ECSA) of the

electrocatalysts is evaluated by measurement of their double layer charging capacitance in 1 M KOH solution. Briefly, a potential range where no apparent Faradaic process occurred was determined firstly using cyclic voltammetry (CV). The charging current ( $i_c$ ) in this potential range was then measured from CV plots at different scan rates. The relationship between  $i_c$ , the scan rate ( $\nu$ ), and the double layer charging capacitance ( $C_{DL}$ ) was governed by eq 1.

$$i_c = \nu C_{DL} \quad (1)$$

From the slope of the plot of  $i_c$  vs.  $\nu$ ,  $C_{DL}$  could be obtained which is directly proportional to ECSA. Based on the estimated specific capacitance (0.040 mF/cm<sup>2</sup>) for a planar NiFeO<sub>x</sub> electrode in 1 M NaOH adopted from literature reports, ECSA of the studied electrode could be calculated by  $ECSA = C_{DL}/0.040$ .

Prior to each measurement, the platinum plate counter electrode was routinely treated by soaking in 1 M hydrochloric acid to remove any deposited species. Prior to the experiment, the electrolyte solution was saturated by bubbling O<sub>2</sub> for the OER measurement.

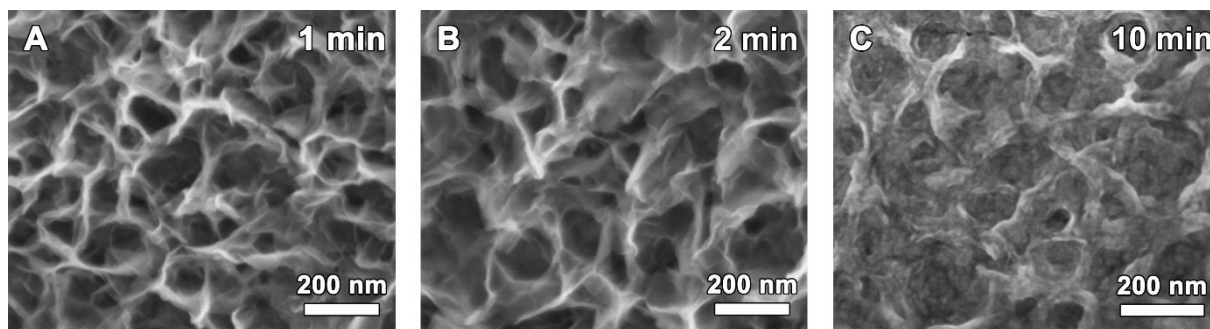

**Figure S1.** (A-C) SEM images of the Ni(OH)<sub>2</sub>-Fe/NF electrodes prepared by different immersion time in Fe(III) solution (1 min, 2 min, 10 min).

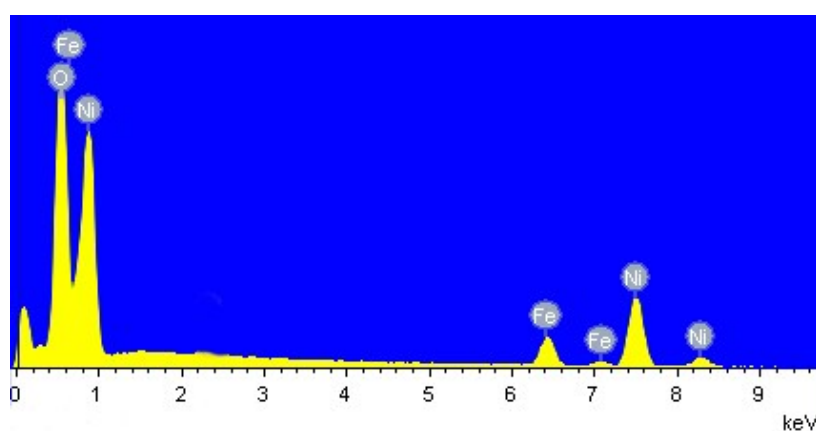

**Figure S2.** SEM-EDX of the Ni(OH)<sub>2</sub>-Fe/NF electrode. The peak intensity ratio between Ni and Fe is 2.5:1.

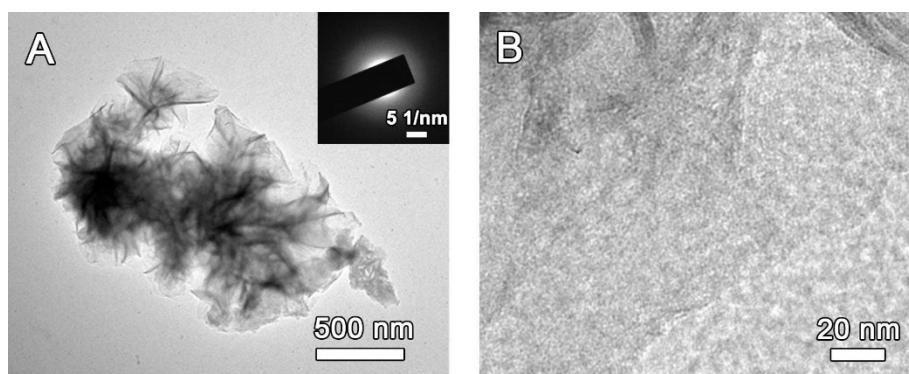

**Figure S3.** (A) TEM and (B) HRTEM images of Ni(OH)<sub>2</sub>-Fe/NF electrode (inset is the SAED pattern).

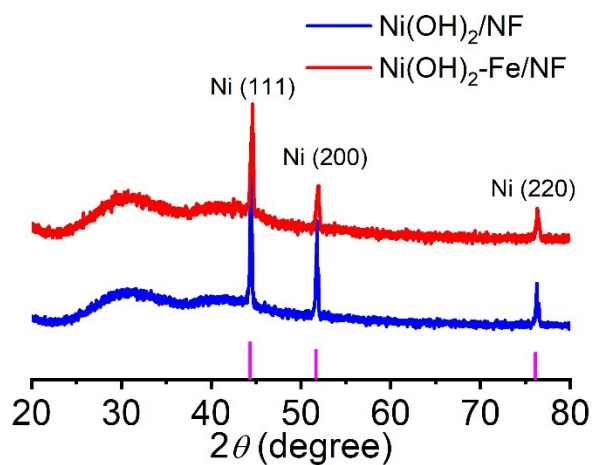

**Figure S4.** XRD patterns of the Ni(OH)<sub>2</sub>/NF and Ni(OH)<sub>2</sub>-Fe/NF electrodes.

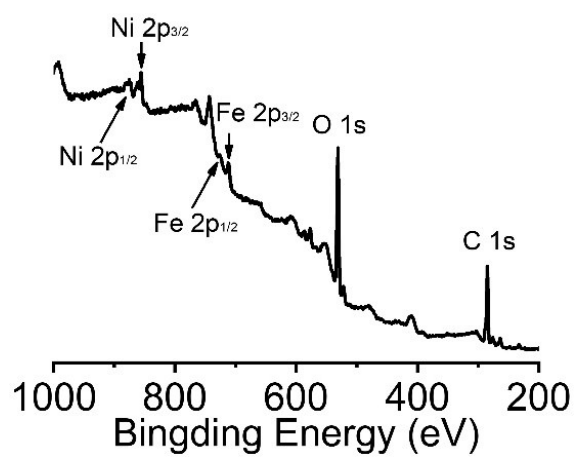

**Figure S5.** The survey XPS of the Ni(OH)<sub>2</sub>-Fe/NF electrode.

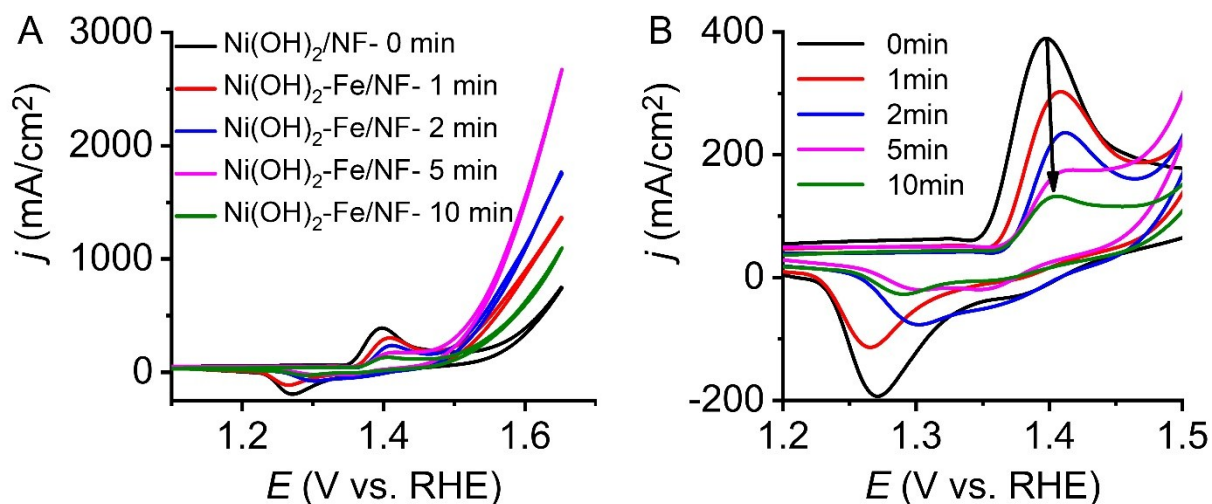

**Figure S6.** (A) CVs of the Ni(OH)<sub>2</sub>-Fe/NF electrodes prepared by immersing the Ni(OH)<sub>2</sub>/NF electrode in Fe(III) solution for different times in 1 M KOH solution. (B) Magnified view in the region of 1.2 - 1.5 V in (A). Scan rate: 20 mV/s.

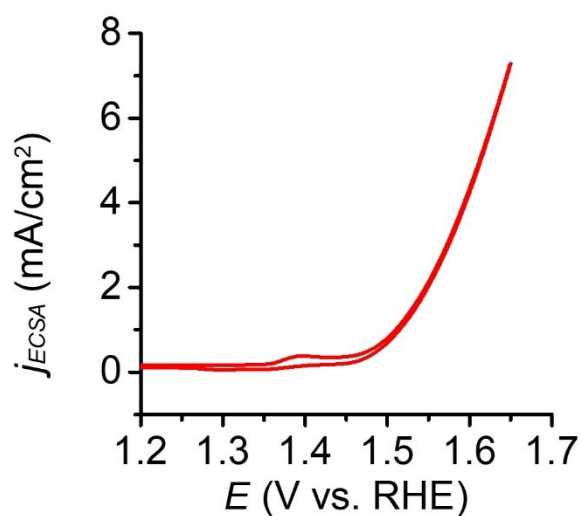

**Figure S7.** (A) Specific current density profile against the applied potentials based on the electrochemically active surface area (ECSA) of the electrode determined from double-layer capacitance. Scan rate: 20 mV/s.
